# Supplementary material for: The reliability of nonlinear least-squares algorithm for data analysis of neural response activity during sinusoidal rotational stimulation in semicircular canal neurons
Source: PLoS One. 2018 Jan 5;13(1):e0190596. doi: 10.1371/journal.pone.0190596 (PMC5755832; doi:10.1371/journal.pone.0190596)
Supplement: S4 File — DOI: 10.6084/m9.figshare.5732352. (XLSX) [file pone.0190596.s004.xlsx]

## Sheet: S4 File
All original data used in the present study
#	Chinchilla	Unit #	Amplitu	Frequ	R2	classify
1	CH50616	Unit 1r	80	0.5	0.9396	regular
2	CH50616	Unit 2r	80	0.5	0.9714	regular
3	CH50416	Unit 3r	80	0.5	0.9673	regular
4	CH50626	Unit 1r	80	0.5	0.9639	regular
5	CH50626	Unit 2r	80	0.5	0.9697	regular
6	CH50701	Unit 1r	80	0.5	0.939	regular
7	CH50701	Unit 2r	80	0.5	0.9874	regular
8	CH50701	Unit 3r	80	1	0.9841	regular
9	CH50708	Unit 1r	80	0.5	0.9586	regular
10	CH50708	Unit 2r	80	0.5	0.9433	regular
11	CH50708	Unit 3r	80	0.5	0.9644	regular
12	CH50708	Unit 4r	80	0.5	0.9772	regular
13	CH50715	Unit 1r	80	0.5	0.9767	regular
14	CH50715	Unit 2r	80	0.5	0.9762	regular
15	CH50715	Unit 3r	80	0.5	0.9639	regular
16	CH50715	Unit 4r	80	0.5	0.968	regular
17	CH50722	Unit 1r	80	1	0.9931	regular
18	CH50722	Unit 2r	80	0.5	0.9905	regular
19	CH50722	Unit 3r	80	0.5	0.9885	regular
20	CH50722	Unit 4r	80	0.5	0.984	regular
21	CH50722	Unit 5r	80	1	0.9898	regular
22	CH50726	Unit 1r	80	0.5	0.9923	regular
23	CH50726	Unit 2r	80	1	0.9911	regular
24	CH50726	Unit 3r	80	0.5	0.9822	regular
25	CH50803	Unit 1r	80	0.5	0.981	regular
26	CH50803	Unit 2r	80	0.5	0.8522	regular
27	CH50803	Unit 3r	80	0.5	0.6711	regular
28	CH50803	Unit 4r	80	0.5	0.8792	regular
29	CH50803	Unit 5r	80	0.5	0.8417	regular
30	CH50804	Unit 1r	80	0.2	0.9904	regular
31	CH50804	Unit 1r	80	0.5	0.9858	regular
32	CH50804	Unit 1r	80	1	0.9907	regular
33	CH50804	Unit 2r	80	0.5	0.9673	regular
34	CH50804	Unit 3r	120	0.5	0.9767	regular
35	CH50804	Unit 4r	120	1	0.9679	regular
36	CH50804	Unit 5r	80	0.5	0.9762	regular
37	CH50805	Unit 1r	80	0.2	0.9282	regular
38	CH50805	Unit 1r	80	0.5	0.9457	regular
39	CH50805	Unit 1r	80	1	0.9197	regular
40	CH50805	Unit 2r	150	0.5	0.9887	regular
41	CH50805	Unit 3r	150	1	0.9884	regular
42	CH50805	Unit 4r	180	0.5	0.9889	regular
43	CH50805	Unit 5r	100	0.5	0.9923	regular
44	CH50806	Unit 1r	80	0.2	0.8415	regular
45	CH50806	Unit 1r	80	0.5	0.7928	regular
46	CH50806	Unit 1r	80	1	0.8296	regular
47	CH50806	Unit 2r	60	0.2	0.9726	regular
48	CH50806	Unit 3r	80	1	0.9646	regular
49	CH50806	Unit 4r	100	1	0.9929	regular
50	CH50806	Unit 5r	120	0.5	0.9911	regular
51	CH50812	Unit 1r	80	0.2	0.9763	regular
52	CH50812	Unit 1r	80	0.5	0.9679	regular
53	CH50812	Unit 1r	80	1	0.9641	regular
54	CH50812	Unit 2r	80	0.2	0.9889	regular
55	CH50812	Unit 3r	80	0.5	0.9915	regular
56	CH50812	Unit 4r	80	1	0.9924	regular
57	CH50819	Unit 1r	80	0.2	0.9545	regular
58	CH50819	Unit 1r	80	0.5	0.9533	regular
59	CH50819	Unit 1r	80	1	0.9566	regular
60	CH50819	Unit 2r	80	0.2	0.9772	regular
61	CH50819	Unit 2r	80	0.5	0.971	regular
62	CH50819	Unit 2r	80	1	0.9777	regular
63	CH50819	Unit 3r	80	0.2	0.9379	regular
64	CH50819	Unit 3r	80	0.5	0.933	regular
65	CH50819	Unit 3r	80	1	0.9317	regular
66	CH50830	Unit 1r	80	0.2	0.9817	regular
67	CH50830	Unit 1r	80	0.5	0.9825	regular
68	CH50830	Unit 1r	80	1	0.9829	regular
69	CH50830	Unit 2r	80	0.2	0.9294	regular
70	CH50830	Unit 2r	80	0.5	0.967	regular
71	CH50830	Unit 2r	80	1	0.9199	regular
72	CH50830	Unit 4r	80	0.2	0.9801	regular
73	CH50830	Unit 4r	80	0.5	0.9768	regular
74	CH50830	Unit 4r	80	1	0.9654	regular
75	CH50830	Unit 5r	80	0.2	0.9834	regular
76	CH50830	Unit 5r	80	0.5	0.9486	regular
77	CH50830	Unit 5r	80	1	0.8832	regular
78	CH50830	Unit 6r	120	0.5	0.9639	regular
79	CH50830	Unit 7r	150	0.5	0.968	regular
80	CH50830	Unit 8r	150	1	0.9654	regular
81	CH50830	Unit 9r	80	0.5	0.9911	regular
82	CH50901	Unit 1r	80	0.2	0.9881	regular
83	CH50901	Unit 1r	80	0.5	0.9912	regular
84	CH50901	Unit 1r	80	1	0.9882	regular
85	CH50901	Unit 2r	80	0.2	0.9468	regular
86	CH50901	Unit 2r	80	0.5	0.9488	regular
87	CH50901	Unit 2r	80	1	0.944	regular
88	CH50901	Unit3r	80	0.2	0.9851	regular
89	CH50901	Unit3r	80	0.5	0.9852	regular
90	CH50901	Unit3r	80	1	0.9887	regular
91	CH50901	Unit 4r	80	0.2	0.9865	regular
92	CH50901	Unit 4r	80	0.5	0.9898	regular
93	CH50901	Unit 4r	80	1	0.9914	regular
94	CH50901	Unit 5r	80	0.2	0.9799	regular
95	CH50901	Unit 5r	80	0.5	0.9846	regular
96	CH50901	Unit 5r	80	1	0.9848	regular
97	CH50903	Unit 1r	80	0.2	0.9725	regular
98	CH50903	Unit 1r	80	0.5	0.9741	regular
99	CH50903	Unit 1r	80	1	0.9687	regular
100	CH50903	Unit 2r	80	0.5	0.9778	regular
101	CH50903	Unit 3r	80	0.5	0.9741	regular
102	CH50903	Unit 5r	80	0.5	0.9706	regular
103	CH50903	Unit 6r	80	0.5	0.9731	regular
104	CH50904	Unit 1r	80	0.2	0.9248	regular
105	CH50904	Unit 1r	80	0.5	0.9856	regular
106	CH50904	Unit 1r	80	1	0.9051	regular
107	CH50904	Unit 2r	80	0.2	0.9855	regular
108	CH50904	Unit 2r	80	0.5	0.9739	regular
109	CH50904	Unit 2r	80	1	0.8933	regular
110	CH50904	Unit 3r	80	0.5	0.8404	regular
111	CH50904	Unit 4r	120	0.5	0.9711	regular
112	CH50904	Unit 5r	100	0.5	0.9898	regular
113	CH50904	Unit 6r	100	1	0.9891	regular
114	CH50904	Unit 7r	100	0.5	0.9905	regular
115	CH50909	Unit 2r	80	0.2	0.9803	regular
116	CH50909	Unit 2r	80	0.5	0.9785	regular
117	CH50909	Unit 2r	80	1	0.9662	regular
118	CH50909	Unit 3r	80	0.2	0.9368	regular
119	CH50909	Unit 3r	80	0.5	0.9188	regular
120	CH50909	Unit 3r	80	1	0.8977	regular
121	CH50909	Unit 4r	80	0.2	0.9436	regular
122	CH50909	Unit 4r	80	0.5	0.9279	regular
123	CH50909	Unit 4r	80	1	0.8255	regular
124	CH50909	Unit 5r	120	1	0.966	regular
125	CH50909	Unit 6r	80	1	0.9919	regular
126	CH50909	Unit 7r	100	1	0.9903	regular
127	CH50909	Unit 8r	120	0.5	0.9885	regular
128	CH50909	Unit 9r	120	1	0.9867	regular
129	CH51104	Unit 1r	80	0.2	0.9862	regular
130	CH51104	Unit 1r	80	0.5	0.9865	regular
131	CH51104	Unit 1r	80	1	0.9832	regular
132	CH51104	Unit 2r	80	0.2	0.859	regular
133	CH51104	Unit 2r	80	0.5	0.7081	regular
134	CH51104	Unit 2r	80	1	0.7621	regular
135	CH51104	Unit 3r	80	0.2	0.98	regular
136	CH51104	Unit 3r	80	0.5	0.9809	regular
137	CH51104	Unit 3r	80	1	0.9807	regular
138	CH50905	Unit 1r	80	0.2	0.9006	regular
139	CH50905	Unit 1r	80	0.5	0.8404	regular
140	CH50905	Unit 1r	80	1	0.8978	regular
141	CH50905	Unit 2r	80	0.2	0.9324	regular
142	CH50905	Unit 2r	80	0.5	0.9383	regular
143	CH50905	Unit 2r	80	1	0.9418	regular
144	CH50905	Unit 3r	120	1	0.988	regular
145	CH50905	Unit 4r	150	0.5	0.9902	regular
146	CH50905	Unit 5r	150	1	0.9891	regular
147	CH50905	Unit 6r	100	0.2	0.9541	regular
148	CH50910	Unit 1r	80	0.2	0.9442	regular
149	CH50910	Unit 1r	80	0.5	0.9567	regular
150	CH50910	Unit 1r	80	1	0.9405	regular
151	CH50910	Unit 2r	80	0.2	0.9473	regular
152	CH50910	Unit 2r	80	0.5	0.9364	regular
153	CH50910	Unit 2r	80	1	0.8191	regular
154	CH50910	Unit 3r	80	0.2	0.8533	regular
155	CH50910	Unit 3r	80	0.5	0.8998	regular
156	CH50910	Unit 3r	80	1	0.9116	regular
157	CH60519	Unit 1r	60	0.2	0.6471	regular
158	CH60519	Unit 1r	80	0.2	0.7712	regular
159	CH60519	Unit 1r	100	0.2	0.8496	regular
160	CH60519	Unit 1r	120	0.2	0.8705	regular
161	CH60519	Unit 1r	150	0.2	0.917	regular
162	CH60519	Unit 1r	180	0.2	0.9397	regular
163	CH60519	Unit 2r	60	0.2	0.9193	regular
164	CH60519	Unit 2r	80	0.2	0.912	regular
165	CH60519	Unit 2r	100	0.2	0.9237	regular
166	CH60519	Unit 2r	120	0.2	0.8959	regular
167	CH60519	Unit 2r	150	0.2	0.9211	regular
168	CH60519	Unit 2r	180	0.2	0.9351	regular
169	CH60525	Unit 1r	60	0.2	0.853	regular
170	CH60525	Unit 1r	80	0.2	0.9012	regular
171	CH60525	Unit 1r	100	0.2	0.8844	regular
172	CH60525	Unit 1r	120	0.2	0.9063	regular
173	CH60525	Unit 1r	150	0.2	0.9285	regular
174	CH60525	Unit 1r	180	0.2	0.9184	regular
175	CH60526	Unit 1r	60	0.2	0.6525	regular
176	CH60526	Unit 1r	80	0.2	0.8022	regular
177	CH60526	Unit 1r	100	0.2	0.8679	regular
178	CH60526	Unit 1r	120	0.2	0.8904	regular
179	CH60526	Unit 1r	150	0.2	0.9423	regular
180	CH60526	Unit 1r	180	0.2	0.8736	regular
181	CH60526	Unit 2r	60	0.2	0.853	regular
182	CH60526	Unit 2r	80	0.2	0.8776	regular
183	CH60526	Unit 2r	100	0.2	0.9179	regular
184	CH60526	Unit 2r	120	0.2	0.9151	regular
185	CH60526	Unit 2r	150	0.2	0.9564	regular
186	CH60526	Unit 2r	180	0.2	0.961	regular
187	CH60526	Unit 3r	60	0.2	0.8473	regular
188	CH60526	Unit 3r	80	0.2	0.921	regular
189	CH60526	Unit 3r	100	0.2	0.9622	regular
190	CH60526	Unit 3r	120	0.2	0.9466	regular
191	CH60526	Unit 3r	150	0.2	0.946	regular
192	CH60526	Unit 3r	180	0.2	0.915	regular
193	CH60528	Unit 1r	60	0.2	0.8863	regular
194	CH60528	Unit 1r	80	0.2	0.8944	regular
195	CH60528	Unit 1r	100	0.2	0.8873	regular
196	CH60528	Unit 1r	120	0.2	0.9218	regular
197	CH60528	Unit 1r	150	0.2	0.9298	regular
198	CH60528	Unit 1r	180	0.2	0.9113	regular
199	CH60530	Unit 1r	60	0.2	0.9656	regular
200	CH60530	Unit 1r	80	0.2	0.9806	regular
201	CH60530	Unit 1r	100	0.2	0.9847	regular
202	CH60530	Unit 1r	120	0.2	0.9836	regular
203	CH60530	Unit 1r	150	0.2	0.9818	regular
204	CH60530	Unit 1r	180	0.2	0.9793	regular
205	CH60608	Unit 1r	60	0.2	0.5926	regular
206	CH60608	Unit 1r	80	0.2	0.7659	regular
207	CH60608	Unit 1r	100	0.2	0.8387	regular
208	CH60608	Unit 1r	120	0.2	0.8657	regular
209	CH60608	Unit 1r	150	0.2	0.9234	regular
210	CH60608	Unit 1r	180	0.2	0.935	regular
211	CH60608	Unit 2r	60	0.2	0.8689	regular
212	CH60608	Unit 2r	80	0.2	0.8937	regular
213	CH60608	Unit 2r	100	0.2	0.9187	regular
214	CH60608	Unit 2r	120	0.2	0.9256	regular
215	CH60608	Unit 2r	150	0.2	0.9638	regular
216	CH60608	Unit 2r	180	0.2	0.9605	regular
217	CH60608	Unit 3r	180	0.2	0.9713	regular
218	CH60610	Unit 1r	60	0.2	0.9091	regular
219	CH60610	Unit 1r	80	0.2	0.9525	regular
220	CH60610	Unit 1r	100	0.2	0.9475	regular
221	CH60610	Unit 1r	120	0.2	0.94	regular
222	CH60610	Unit 1r	150	0.2	0.9441	regular
223	CH60610	Unit 1r	180	0.2	0.979825	regular
224	CH60610	Unit 2r	60	0.2	0.9378	regular
225	CH60610	Unit 2r	80	0.2	0.9559	regular
226	CH60610	Unit 2r	100	0.2	0.973	regular
227	CH60610	Unit 2r	120	0.2	0.9479	regular
228	CH60610	Unit 2r	150	0.2	0.9123	regular
229	CH60610	Unit 2r	180	0.2	0.9641	regular
230	CH60615	Unit 1r	60	0.2	0.8949	regular
231	CH60615	Unit 1r	80	0.2	0.9221	regular
232	CH60615	Unit 1r	100	0.2	0.9677	regular
233	CH60615	Unit 1r	120	0.2	0.9688	regular
234	CH60615	Unit 1r	150	0.2	0.952	regular
235	CH60615	Unit 1r	180	0.2	0.9625	regular
236	CH60615	Unit 2r	60	0.2	0.8627	regular
237	CH60615	Unit 2r	80	0.2	0.8897	regular
238	CH60615	Unit 2r	100	0.2	0.9231	regular
239	CH60615	Unit 2r	120	0.2	0.9391	regular
240	CH60615	Unit 2r	150	0.2	0.9505	regular
241	CH60615	Unit 2r	180	0.2	0.9574	regular
242	CH60615	Unit 3r	60	0.2	0.9115	regular
243	CH60615	Unit 3r	80	0.2	0.9425	regular
244	CH60615	Unit 3r	100	0.2	0.9256	regular
245	CH60615	Unit 3r	120	0.2	0.9561	regular
246	CH60615	Unit 3r	150	0.2	0.9541	regular
247	CH60615	Unit 3r	180	0.2	0.9625	regular
248	CH60620	Unit 1r	60	0.2	0.9254	regular
249	CH60620	Unit 1r	80	0.2	0.9813	regular
250	CH60620	Unit 1r	100	0.2	0.9843	regular
251	CH60620	Unit 1r	120	0.2	0.9809	regular
252	CH60620	Unit 1r	150	0.2	0.9848	regular
253	CH60620	Unit 1r	180	0.2	0.9848	regular
254	CH60620	Unit 2r	60	0.2	0.9314	regular
255	CH60620	Unit 2r	80	0.2	0.9792	regular
256	CH60620	Unit 2r	100	0.2	0.9856	regular
257	CH60620	Unit 2r	120	0.2	0.9841	regular
258	CH60620	Unit 2r	150	0.2	0.9847	regular
259	CH60620	Unit 2r	180	0.2	0.985	regular
260	CH 60620	Unit 3r	60	0.2	0.7937	regular
261	CH 60620	Unit 3r	80	0.2	0.8427	regular
262	CH 60620	Unit 3r	100	0.2	0.8957	regular
263	CH 60620	Unit 3r	120	0.2	0.9359	regular
264	CH 60620	Unit 3r	150	0.2	0.9532	regular
265	CH 60620	Unit 3r	180	0.2	0.9475	regular
266	CH50715	Unit 1ir	80	0.2	0.9076	irregular
267	CH50715	Unit 1ir	80	0.5	0.9043	irregular
268	CH50715	Unit 1ir	80	1	0.8956	irregular
269	CH50715	Unit 2ir	80	0.2	0.955	irregular
270	CH50715	Unit 2ir	80	0.5	0.9327	irregular
271	CH50715	Unit 2ir	80	1	0.8988	irregular
272	CH50715	Unit 3ir	80	0.5	0.5219	irregular
273	CH50715	Unit 4ir	80	0.5	0.6984	irregular
274	CH50715	Unit 5ir	80	0.5	0.4872	irregular
275	CH50803	Unit 1ir	80	0.2	0.9494	irregular
276	CH50803	Unit 1ir	80	0.5	0.9021	irregular
277	CH50803	Unit 1ir	80	1	0.8778	irregular
278	CH50803	Unit 2ir	80	0.5	0.7467	irregular
279	CH50803	Unit 3ir	80	0.5	0.6012	irregular
280	CH50805	Unit 1ir	80	0.2	0.8975	irregular
281	CH50805	Unit 1ir	80	0.5	0.6869	irregular
282	CH50805	Unit 1ir	80	1	0.8903	irregular
283	CH50805	Unit 2ir	80	0.2	0.8735	irregular
284	CH50805	Unit 2ir	80	0.5	0.8754	irregular
285	CH50805	Unit 2ir	80	1	0.8537	irregular
286	CH50812	Unit 1ir	80	0.2	0.844	irregular
287	CH50812	Unit 1ir	80	0.5	0.8491	irregular
288	CH50812	Unit 1ir	80	1	0.8465	irregular
289	CH50812	Unit 2ir	80	0.5	0.7588	irregular
290	CH50812	Unit 3ir	80	0.5	0.429	irregular
291	CH50812	Unit 4ir	80	0.5	0.4171	irregular
292	CH50819	Unit 1ir	80	0.2	0.93	irregular
293	CH50819	Unit 1ir	80	0.5	0.9299	irregular
294	CH50819	Unit 1ir	80	1	0.9118	irregular
295	CH50819	Unit 2ir	80	0.2	0.7789	irregular
296	CH50819	Unit 2ir	80	0.5	0.7159	irregular
297	CH50819	Unit 2ir	80	1	0.7409	irregular
298	CH50830	Unit 1ir	80	0.2	0.7662	irregular
299	CH50830	Unit 1ir	80	0.5	0.7286	irregular
300	CH50830	Unit 1ir	80	1	0.7026	irregular
301	CH50830	Unit 2ir	80	0.5	0.7322	irregular
302	CH50830	Unit 3ir	80	0.5	0.7403	irregular
303	CH50903	Unit 1ir	80	0.2	0.9571	irregular
304	CH50903	Unit 1ir	80	0.5	0.9523	irregular
305	CH50903	Unit 1ir	80	1	0.9233	irregular
306	CH50909	Unit 1ir	80	0.2	0.9169	irregular
307	CH50909	Unit 1ir	80	0.5	0.7789	irregular
308	CH50909	Unit 1ir	80	1	0.5581	irregular
309	CH50909	Unit 2ir	80	0.2	0.8948	irregular
310	CH50909	Unit 2ir	80	0.5	0.6523	irregular
311	CH50909	Unit 2ir	80	1	0.2418	irregular
312	CH51104	Unit 1ir	80	0.2	0.8774	irregular
313	CH51104	Unit 1ir	80	0.5	0.8588	irregular
314	CH51104	Unit 1ir	80	1	0.5138	irregular
315	CH51104	Unit 2ir	80	0.2	0.9115	irregular
316	CH51104	Unit 2ir	80	0.5	0.7814	irregular
317	CH51104	Unit 2ir	80	1	0.8869	irregular
318	CH50905	Unit 1ir	80	0.2	0.8437	irregular
319	CH50905	Unit 1ir	80	0.5	0.8153	irregular
320	CH50905	Unit 1ir	80	1	0.7346	irregular
321	CH50905	Unit 2ir	80	0.2	0.9476	irregular
322	CH50905	Unit 2ir	80	0.5	0.928	irregular
323	CH50905	Unit 2ir	80	1	0.8903	irregular
324	CH50905	Unit 3ir	80	0.2	0.8632	irregular
325	CH50905	Unit 3ir	80	0.5	0.8587	irregular
326	CH50905	Unit 3ir	80	1	0.8502	irregular
327	CH50910	Unit 1ir	80	0.2	0.8378	irregular
328	CH50910	Unit 1ir	80	0.5	0.7662	irregular
329	CH50910	Unit 1ir	80	1	0.8183	irregular
330	CH50910	Unit 2ir	80	0.2	0.8782	irregular
331	CH50910	Unit 2ir	80	0.5	0.7663	irregular
332	CH50910	Unit 2ir	80	1	0.8566	irregular
333	CH50910	Unit 3ir	80	0.2	0.8921	irregular
334	CH50910	Unit 3ir	80	0.5	0.7625	irregular
335	CH50910	Unit 3ir	80	1	0.7947	irregular
336	CH60519	Unit 1ir	60	0.2	0.5157	irregular
337	CH60519	Unit 1ir	80	0.2	0.6379	irregular
338	CH60519	Unit 1ir	100	0.2	0.8009	irregular
339	CH60519	Unit 1ir	120	0.2	0.8557	irregular
340	CH60519	Unit 1ir	150	0.2	0.8368	irregular
341	CH60519	Unit 1ir	180	0.2	0.8894	irregular
342	CH60519	Unit 2ir	80	0.5	0.7003	irregular
343	CH60519	Unit 3ir	80	0.5	0.5634	irregular
344	CH60519	Unit 4ir	80	0.5	0.7631	irregular
345	CH60519	Unit 5ir	80	0.5	0.7426	irregular
346	CH60525	Unit 1ir	60	0.2	0.6081	irregular
347	CH60525	Unit 1ir	80	0.2	0.7132	irregular
348	CH60525	Unit 1ir	100	0.2	0.7474	irregular
349	CH60525	Unit 1ir	120	0.2	0.8853	irregular
350	CH60525	Unit 1ir	150	0.2	0.8599	irregular
351	CH60525	Unit 1ir	180	0.2	0.8564	irregular
352	CH60525	Unit 2ir	60	0.2	0.5717	irregular
353	CH60525	Unit 2ir	80	0.2	0.6315	irregular
354	CH60525	Unit 2ir	100	0.2	0.602	irregular
355	CH60525	Unit 2ir	120	0.2	0.6284	irregular
356	CH60525	Unit 2ir	150	0.2	0.729	irregular
357	CH60525	Unit 2ir	180	0.2	0.7141	irregular
358	CH60528	Unit 1ir	60	0.2	0.6747	irregular
359	CH60528	Unit 1ir	80	0.2	0.7201	irregular
360	CH60528	Unit 1ir	100	0.2	0.812	irregular
361	CH60528	Unit 1ir	120	0.2	0.8192	irregular
362	CH60528	Unit 1ir	150	0.2	0.8399	irregular
363	CH60528	Unit 1ir	180	0.2	0.8782	irregular
364	CH60528	Unit 2ir	60	0.2	0.6527	irregular
365	CH60528	Unit 2ir	80	0.2	0.8298	irregular
366	CH60528	Unit 2ir	100	0.2	0.8343	irregular
367	CH60528	Unit 2ir	120	0.2	0.8177	irregular
368	CH60528	Unit 2ir	150	0.2	0.8109	irregular
369	CH60528	Unit 2ir	180	0.2	0.8106	irregular
370	CH60530	Unit 1ir	60	0.2	0.6661	irregular
371	CH60530	Unit 1ir	80	0.2	0.6462	irregular
372	CH60530	Unit 1ir	100	0.2	0.7288	irregular
373	CH60530	Unit 1ir	120	0.2	0.784	irregular
374	CH60530	Unit 1ir	150	0.2	0.8636	irregular
375	CH60530	Unit 1ir	180	0.2	0.877	irregular
376	CH60608	Unit 1ir	60	0.2	0.8955	irregular
377	CH60608	Unit 1ir	80	0.2	0.9472	irregular
378	CH60608	Unit 1ir	100	0.2	0.9253	irregular
379	CH60608	Unit 1ir	120	0.2	0.9158	irregular
380	CH60608	Unit 1ir	150	0.2	0.9173	irregular
381	CH60608	Unit 1ir	180	0.2	0.9198	irregular
382	CH60608	Unit 2ir	60	0.2	0.5479	irregular
383	CH60608	Unit 2ir	80	0.2	0.7703	irregular
384	CH60608	Unit 2ir	100	0.2	0.7348	irregular
385	CH60608	Unit 2ir	120	0.2	0.7874	irregular
386	CH60608	Unit 2ir	150	0.2	0.8097	irregular
387	CH60608	Unit 2ir	180	0.2	0.8186	irregular
388	CH60608	Unit 3ir	60	0.2	0.6477	irregular
389	CH60608	Unit 3ir	80	0.2	0.6462	irregular
390	CH60608	Unit 3ir	100	0.2	0.7116	irregular
391	CH60608	Unit 3ir	120	0.2	0.8206	irregular
392	CH60608	Unit 3ir	150	0.2	0.8636	irregular
393	CH60608	Unit 3ir	180	0.2	0.877	irregular
394	CH60610	Unit 1ir	60	0.2	0.6432	irregular
395	CH60610	Unit 1ir	80	0.2	0.8492	irregular
396	CH60610	Unit 1ir	100	0.2	0.8776	irregular
397	CH60610	Unit 1ir	120	0.2	0.8689	irregular
398	CH60610	Unit 1ir	150	0.2	0.8961	irregular
399	CH60610	Unit 1ir	180	0.2	0.9011	irregular
400	CH60610	Unit 2ir	60	0.2	0.6331	irregular
401	CH60610	Unit 2ir	80	0.2	0.812	irregular
402	CH60610	Unit 2ir	100	0.2	0.846	irregular
403	CH60610	Unit 2ir	120	0.2	0.8935	irregular
404	CH60610	Unit 2ir	150	0.2	0.9312	irregular
405	CH60610	Unit 2ir	180	0.2	0.9244	irregular
406	CH60610	Unit 3ir	60	0.2	0.6428	irregular
407	CH60610	Unit 3ir	80	0.2	0.8306	irregular
408	CH60610	Unit 3ir	100	0.2	0.8213	irregular
409	CH60610	Unit 3ir	120	0.2	0.841	irregular
410	CH60610	Unit 3ir	150	0.2	0.8743	irregular
411	CH60610	Unit 3ir	180	0.2	0.9323	irregular
412	CH60615	Unit 1ir	60	0.2	0.5667	irregular
413	CH60615	Unit 1ir	80	0.2	0.7486	irregular
414	CH60615	Unit 1ir	100	0.2	0.7692	irregular
415	CH60615	Unit 1ir	120	0.2	0.8773	irregular
416	CH60615	Unit 1ir	150	0.2	0.8622	irregular
417	CH60615	Unit 1ir	180	0.2	0.8861	irregular
418	CH60615	Unit 2ir	60	0.2	0.6652	irregular
419	CH60615	Unit 2ir	80	0.2	0.6334	irregular
420	CH60615	Unit 2ir	100	0.2	0.704	irregular
421	CH60615	Unit 2ir	120	0.2	0.8078	irregular
422	CH60615	Unit 2ir	150	0.2	0.8693	irregular
423	CH60615	Unit 2ir	180	0.2	0.8917	irregular
424	CH60615	Unit 3ir	60	0.2	0.6115	irregular
425	CH60615	Unit 3ir	80	0.2	0.812	irregular
426	CH60615	Unit 3ir	100	0.2	0.8435	irregular
427	CH60615	Unit 3ir	120	0.2	0.8775	irregular
428	CH60615	Unit 3ir	150	0.2	0.9279	irregular
429	CH60615	Unit 3ir	180	0.2	0.9281	irregular
430	CH60620	Unit 1ir	60	0.2	0.5618	irregular
431	CH60620	Unit 1ir	80	0.2	0.7434	irregular
432	CH60620	Unit 1ir	100	0.2	0.7263	irregular
433	CH60620	Unit 1ir	120	0.2	0.8119	irregular
434	CH60620	Unit 1ir	150	0.2	0.8522	irregular
435	CH60620	Unit 1ir	180	0.2	0.9063	irregular
436	CH60620	Unit 2ir	60	0.2	0.8311	irregular
437	CH60620	Unit 2ir	80	0.2	0.909	irregular
438	CH60620	Unit 2ir	100	0.2	0.9247	irregular
439	CH60620	Unit 2ir	120	0.2	0.9302	irregular
440	CH60620	Unit 2ir	150	0.2	0.9274	irregular
441	CH60620	Unit 2ir	180	0.2	0.94	irregular
442	CH60620	Unit 3ir	60	0.2	0.7	irregular
443	CH60620	Unit 3ir	80	0.2	0.7409	irregular
444	CH60620	Unit 3ir	100	0.2	0.8225	irregular
445	CH60620	Unit 3ir	120	0.2	0.8249	irregular
446	CH60620	Unit 3ir	150	0.2	0.8514	irregular
447	CH60620	Unit 3ir	180	0.2	0.8803	irregular
